# Supplementary material
Source: Copernicus journal article supplement (doi:10.5194/cp-22-1241-2026)
Supplement: Supplementary file 1 [file cp-22-1241-2026-supplement.pdf]

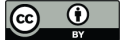

*Supplement of*

## **South Atlantic lipid biomarkers support synchronous Plio-Pleistocene global cooling: revising the ODP Site 1090 sea surface temperature record**

**Brianna Hoegler et al.**

*Correspondence to:* Brianna Hoegler (brianna\_hoegler@brown.edu)

The copyright of individual parts of the supplement might differ from the article licence.

SUPPLEMENTAL INFORMATION

**Supporting Materials for Hoegler et al.**

Methods: Determining Detection Limit

Tables S1 to S6

Figures S1 to S6

Supplemental References

**Methods: Determining Detection Limit**

To determine the limit of detection (LOD) for the C<sub>37</sub> alkenones under the same analytical conditions used to construct the SST record, we conducted an experiment an extraction of marine sediment containing alkenones used as a laboratory reference analysed on the GC-FID with identical instrument settings (column, temperature program, and an injection volume of 10 µL out of a total sample extract of 210 µL) used during our ODP Site 1090 data collection. The standard was run at progressively lower concentrations, each 1/5 dilution of the previous, until the peak height of the C<sub>37</sub> alkenones was approximately three times the baseline noise level, consistent with a signal-to-noise ratio of ~3 commonly used to define the LOD (Table S5). Based on this assessment and considering the sediment mass extracted for our samples (7–10 g per sample), we determined that the detection limit corresponds to approximately 0.6–1.0 ng C<sub>37</sub> alkenones per gram of sediment (Table S6).

**Table S1:** Equations used as part of this study.

| No. | Equation                                                                                                    | Description                                                                                               | Citation                |
|-----|-------------------------------------------------------------------------------------------------------------|-----------------------------------------------------------------------------------------------------------|-------------------------|
| 1   | $U_{37}^{K'} = \frac{[C_{37:2}]}{[C_{37:2} + C_{37:3}]}$                                                    | Simplified alkenone unsaturation index                                                                    | (Prahl et al., 1988)    |
| 2   | $U_{37}^{K'} = 0.033(SST) + 0.044$                                                                          | Linear, global core-top calibration of SST to U <sup>K'</sup> <sub>37</sub>                               | (Müller et al., 1998)   |
| 3   | $U_{37}^K = \frac{[C_{37:2} - C_{37:4}]}{[C_{37:2} + C_{37:3} + C_{37:4}]}$                                 | Alkenone unsaturation index                                                                               | (Brassell et al., 1986) |
| 4   | $U_{37}^{K'} = 0.033(SST) + 0.043$                                                                          | Linear, culture-based calibration of growth temperature to U <sup>K'</sup> <sub>37</sub>                  | (Prahl & Wakeham, 1987) |
| 5   | $\textit{inferred } U_{37}^{K'} = \frac{U_{37}^K + (\%C_{37:4} \times 0.01)}{1 - (\%C_{37:4} \times 0.01)}$ | Calculate inferred U <sup>K'</sup> <sub>37</sub> from U <sup>K</sup> <sub>37</sub> and %C <sub>37:4</sub> | This study              |

**Table S2: Composite Sections and Interval Shifts**

| <b>Sample ID</b>                           | <b>Relevance to Composite Splice</b> | <b>Shipboard MCD</b> | <b>Shift Relative to shipboard MCD</b> | <b>New MCD</b> |
|--------------------------------------------|--------------------------------------|----------------------|----------------------------------------|----------------|
| <i>0–56.63 MCD Interval: Holes D and E</i> |                                      |                      |                                        |                |
| 177 1090D 1H 3A 27-29                      | Interval start                       | 3.62                 | 0                                      | 3.62           |
| 177 1090D 6H 4A 126-128                    | Interval end                         | 56.63                | 0                                      | 56.63          |
| <i>56.64–61.59 MCD Interval: Hole E</i>    |                                      |                      |                                        |                |
| 177 1090E 6H 2A 1-3                        | Interval start                       | 56.64                | 0                                      | 56.64          |
| 177 1090E 6H 5A 46-48                      | Interval End                         | 61.59                | 0                                      | 61.59          |
| <i>61.50–67.50 MCD Interval: Hole D</i>    |                                      |                      |                                        |                |
| 177 1090D 7H 1A 46-48                      | Interval start                       | 61.45                | +0.05                                  | 61.50          |
| 177 1090D 7H 5A 46-48                      | Interval end                         | 67.45                | +0.05                                  | 67.50          |
| <i>67.50– MCD Interval: Hole E</i>         |                                      |                      |                                        |                |
| 177 1090E 7H 1A 110-112                    | Interval start                       | 66.20                | +1.30                                  | 67.50          |
| 177 1090E 7H 4A 26-28                      | Interval end                         | 69.86                | +1.31                                  | 71.17          |

**Table S3:** Age model tie points (N=33)

| <b>MCD</b> | <b>Age (kya)</b> | <b>Implied Sedimentation<br/>Rate (cm/kyr)</b> | <b>Tie point notes</b>                               |
|------------|------------------|------------------------------------------------|------------------------------------------------------|
| 53.78      | 2500             |                                                | Hodell et al., 2003                                  |
| 54.59      | 2580             | 1.012                                          |                                                      |
| 54.90      | 2602             | 1.409                                          | MIS 104/G1 ~2614 ka                                  |
| 56.53      | 2717             | 1.417                                          | ~MIS G6                                              |
| 56.80      | 2740             | 1.174                                          |                                                      |
| 57.55      | 2808             | 1.103                                          | MIS G10                                              |
| 57.80      | 2842             | 0.7353                                         | MIS G12                                              |
| 58.27      | 2887             | 1.044                                          | MIS G14                                              |
| 58.93      | 2935             | 1.375                                          | MIS G16                                              |
| 59.20      | 2946             | 2.455                                          | MIS G17                                              |
| 59.75      | 3017             | 0.7746                                         | ~MIS G20                                             |
| 60.25      | 3081             | 0.7812                                         | MIS K1/K2                                            |
| 60.75      | 3154             | 0.6849                                         | Top Mammoth between 1090E 6H 4A and 5A               |
| 61.70      | 3270             | 0.8190                                         |                                                      |
| 62.00      | 3295             | 1.200                                          | MIS M2                                               |
| 62.29      | 3325             | 0.9667                                         | MIS MG1; base Mammoth 1090D 7H 1A 125                |
| 62.68      | 3388             | 0.6190                                         | MIS MG4/MG5                                          |
| 63.70      | 3533             | 0.7034                                         | MIS MG9                                              |
| 64.54      | 3650             | 0.7099                                         | MIS Gi3; top Gilbert between 1090D 7/2/145 and 7/3/5 |
| 64.775     | 3681             | 0.7581                                         | ~MIS Gi4/Gi5                                         |
| 65.075     | 3716             | 0.85714                                        | ~MIS Gi6/Gi7                                         |
| 65.40      | 3758             | 0.7738                                         |                                                      |
| 66.42      | 3831             | 1.397                                          | MIS Gi12                                             |
| 67.05      | 3874             | 1.465                                          |                                                      |
| 67.85      | 3924             | 1.600                                          | ~MIS Gi16                                            |
| 68.435     | 3966             | 1.393                                          |                                                      |
| 69.05      | 4000             | 1.809                                          | MIS Gi20                                             |
| 69.325     | 4019             | 1.447                                          |                                                      |
| 69.68      | 4040             | 1.690                                          | MIS Gi22                                             |
| 70.22      | 4077             | 1.459                                          | ~MIS Gi23/Gi24                                       |
| 70.59      | 4116             | 0.9487                                         | ~MIS Gi25                                            |
| 71.04      | 4160             | 1.023                                          | MIS Gi26                                             |
| 71.16      | 4176             | 0.7500                                         | MIS Gi26/27                                          |

**Table S4:** %C<sub>37:4</sub> and SST (°C) of samples measured both on the GC-FID and HPLC

| Sample ID                      | Depth (MCD) | %C <sub>37:4</sub> (GC-FID) | %C <sub>37:4</sub> (HPLC) | U <sup>K</sup> <sub>37</sub> SST (°C, GC-FID) | U <sup>K</sup> <sub>37</sub> SST (°C, HPLC) |
|--------------------------------|-------------|-----------------------------|---------------------------|-----------------------------------------------|---------------------------------------------|
| ODP 177 1090 E 6W 2A 121-123   | 57.84       | 3.54                        | 0                         | 12.08                                         | 10.77                                       |
| ODP 177 1090 E 6H 3A 11-13     | 58.24       | 4.69                        | 0.24                      | 16.92                                         | 13.43                                       |
| ODP 177 1090 E 6H 3A 17-18     | 58.30       | 3.45                        | 0.64                      | 14.24                                         | 14.58                                       |
| ODP 177 1090 E 6H 3A 31-33     | 58.44       | 2.55                        | 0                         | 14.81                                         | 13.91                                       |
| ODP 177 1090 E 6H 3A 107-108.5 | 59.20       | 8.99                        | 0                         | 11.49                                         | 12.49                                       |
| ODP 177 1090 E 6H 3A 111-113   | 59.24       | 6.87                        | 0                         | 12.28                                         | 13.92                                       |
| ODP 177 1090 E 6 H 3A 131-133  | 59.44       | 7.56                        | 0.55                      | 13.94                                         | 13.36                                       |
| ODP 177 1090 E 6 H 4A 1-3      | 59.64       | 4.99                        | 0                         | 14.81                                         | 14.50                                       |
| ODP 177 1090 E 6 H 4A 16-18    | 59.79       | 6.39                        | 0                         | 15.52                                         | 15.10                                       |
| ODP 177 1090 E 6 H 4A 106-108  | 60.69       | 3.39                        | 0                         | 16.05                                         | 15.08                                       |
| ODP 177 1090 E 6 H 4A 111-113  | 60.74       | 6.51                        | 0                         | 10.93                                         | 10.52                                       |
| ODP 177 1090 E 6 H 4A 121-123  | 60.84       | 3.57                        | 0                         | 14.39                                         | 14.29                                       |
| ODP 177 1090 E 6 H 5A 6-8      | 61.19       | 2.04                        | 0.12                      | 12.84                                         | 12.81                                       |
| ODP 177 1090 E 6 H 5A 96-98    | 61.95       | 4.20                        | 3.78                      | 14.40                                         | 13.96                                       |
| ODP 177 1090 E 6 H 5A 101-103  | 62.00       | 6.57                        | 0                         | 12.93                                         | 11.86                                       |
| ODP 177 1090 E 6 H 5A 146-148  | 62.45       | 3.04                        | 1.21                      | 14.85                                         | 14.34                                       |

**Table S5:** LOD raw data

| Sample | Area C <sub>36</sub> | Area C <sub>37</sub> | Area C <sub>37:3Me</sub> | Area C <sub>37:2Me</sub> | Height C <sub>36</sub> | Height C <sub>37</sub> | Height C <sub>37:3Me</sub> | Height C <sub>37:2Me</sub> |
|--------|----------------------|----------------------|--------------------------|--------------------------|------------------------|------------------------|----------------------------|----------------------------|
| LOD A  | 60.9122              | 60.4631              | 63.8035                  | 115.6007                 | 16.5584                | 15.6734                | 13.9604                    | 25.1103                    |
| LOD B  | 54.3661              | 53.9451              | 10.9014                  | 20.2913                  | 14.8144                | 13.7195                | 2.3841                     | 4.1504                     |
| LOD C  | 48.7764              | 48.3203              | 1.6641                   | 3.1922                   | 13.0966                | 12.7265                | 0.3979                     | 0.7024                     |
| LOD D  | 49.6348              | 49.1021              | 0.4448                   | 0.623                    | 13.4931                | 12.6407                | 0.0986                     | 0.1497                     |
| LOD E  | 43.818               | 43.4859              | 0.3213                   | 0.7505                   | 11.9728                | 11.3733                | 0.1107                     | 0.1872                     |
| LOD F  | 41.425               | 41.1074              | 0.1142                   | 0.5133                   | 11.3357                | 10.7652                | 0.0672                     | 0.1254                     |

*NOTE:* The green highlight denotes the sample where the height of the C<sub>37:2</sub> and C<sub>37:3</sub> peaks were found to reach the detection limit of approximately 3x the height of the baseline noise, ~0.0550.

**Table S6:** LOD calculations

| Parameter                                                      | Calculation                                    | LOD A   | LOD B    | LOD C    | LOD D    | LOD E    | LOD F    |
|----------------------------------------------------------------|------------------------------------------------|---------|----------|----------|----------|----------|----------|
| concentration C <sub>37:3</sub><br>(ppm)                       | 2 ppm * (C <sub>37:n</sub> peak area) /        | 1.78    | 0.348    | 0.0625   | 0.0156   | 0.0195   | 0.0125   |
| concentration C <sub>37:2</sub><br>(ppm)                       | (internal standard area)                       | 3.20    | 0.605    | 0.110    | 0.0237   | 0.0329   | 0.0233   |
| mass injected C <sub>37:3</sub>                                | concentration * volume                         | 0.00178 | 0.000348 | 0.000625 | 0.000156 | 0.000195 | 0.000125 |
| mass injected C <sub>37:2</sub>                                | injected (mL)                                  | 0.00320 | 0.000605 | 0.00110  | 0.000237 | 0.000329 | 0.000233 |
| mass in sample<br>C <sub>37:3</sub> (µg)                       | mass injected * (210 µL /                      | 0.374   | 0.0730   | 0.0131   | 0.00328  | 0.00409  | 0.00262  |
| mass in sample<br>C <sub>37:2</sub> (µg)                       | injection volume)                              | 0.673   | 0.127    | 0.0232   | 0.00497  | 0.00691  | 0.00489  |
| C <sub>37:3</sub> concentration<br>in sediment (7g)<br>(ng/g)  | 1000 ng/µg * mass in<br>sample / sediment mass | 53.4    | 10.4     | 1.88     | 0.468    | 0.584    | 0.375    |
| C <sub>37:2</sub> concentration<br>in sediment (7g)<br>(ng/g)  | (7 g)                                          | 96.1    | 18.2     | 3.31     | 0.711    | 0.988    | 0.699    |
| C <sub>37:3</sub> concentration<br>in sediment (10g)<br>(ng/g) | 1000 ng/µg * mass in<br>sample / sediment mass | 37.4    | 7.30     | 1.31     | 0.328    | 0.409    | 0.262    |
| C <sub>37:2</sub> concentration<br>in sediment (10g)<br>(ng/g) | (10 g)                                         | 67.3    | 12.7     | 2.32     | 0.497    | 0.691    | 0.489    |

*NOTE:* The green highlight denotes the sample where the height of the C<sub>37:2</sub> and C<sub>37:2</sub> peaks were found to reach the detection limit of approximately 3x the height of the baseline noise, ~0.0550. 7g sediment represents the low end of the extracted mass range, while 10 g sediment represents the high end.

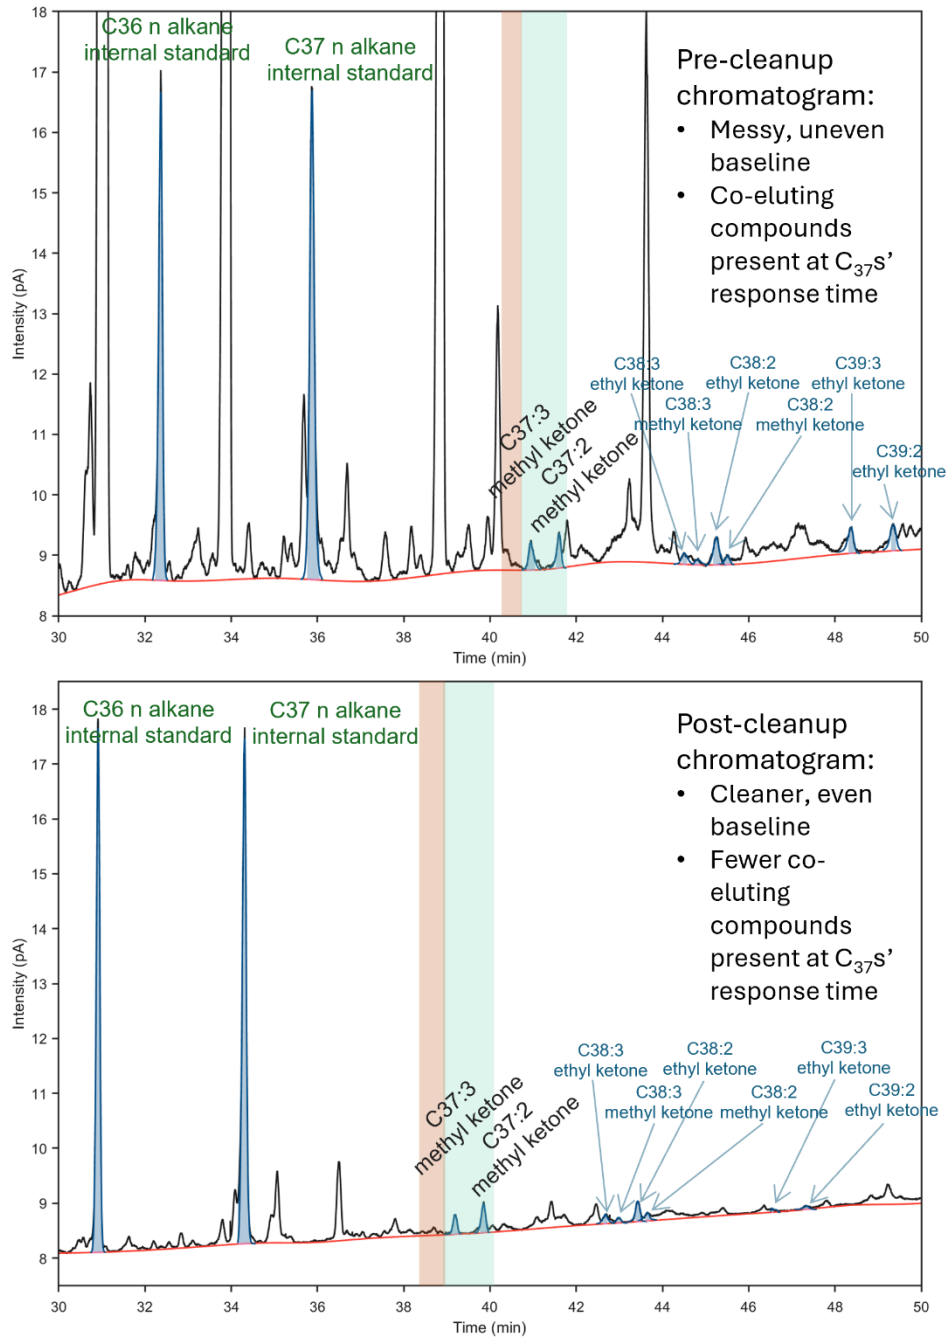

**Fig. S1:** Example chromatogram (sample: 1090D 7H 4A 124-126) showing pre- (above) and post-cleanup (below) GC-FID results. Our internal standards are labelled in green, and the  $C_{37}$  ketones are labelled in black; other ketones of interest are labelled in smaller, blue font. The green highlight shows where we expect to find  $C_{37:2}$  and  $C_{37:3}$  alkenone signals, and the orange highlight shows where a  $C_{37:4}$  signal would elute. After cleanup, we observe a cleaner, less uneven baseline and fewer co-eluting compounds in the  $C_{37}$  alkenones' elution times.

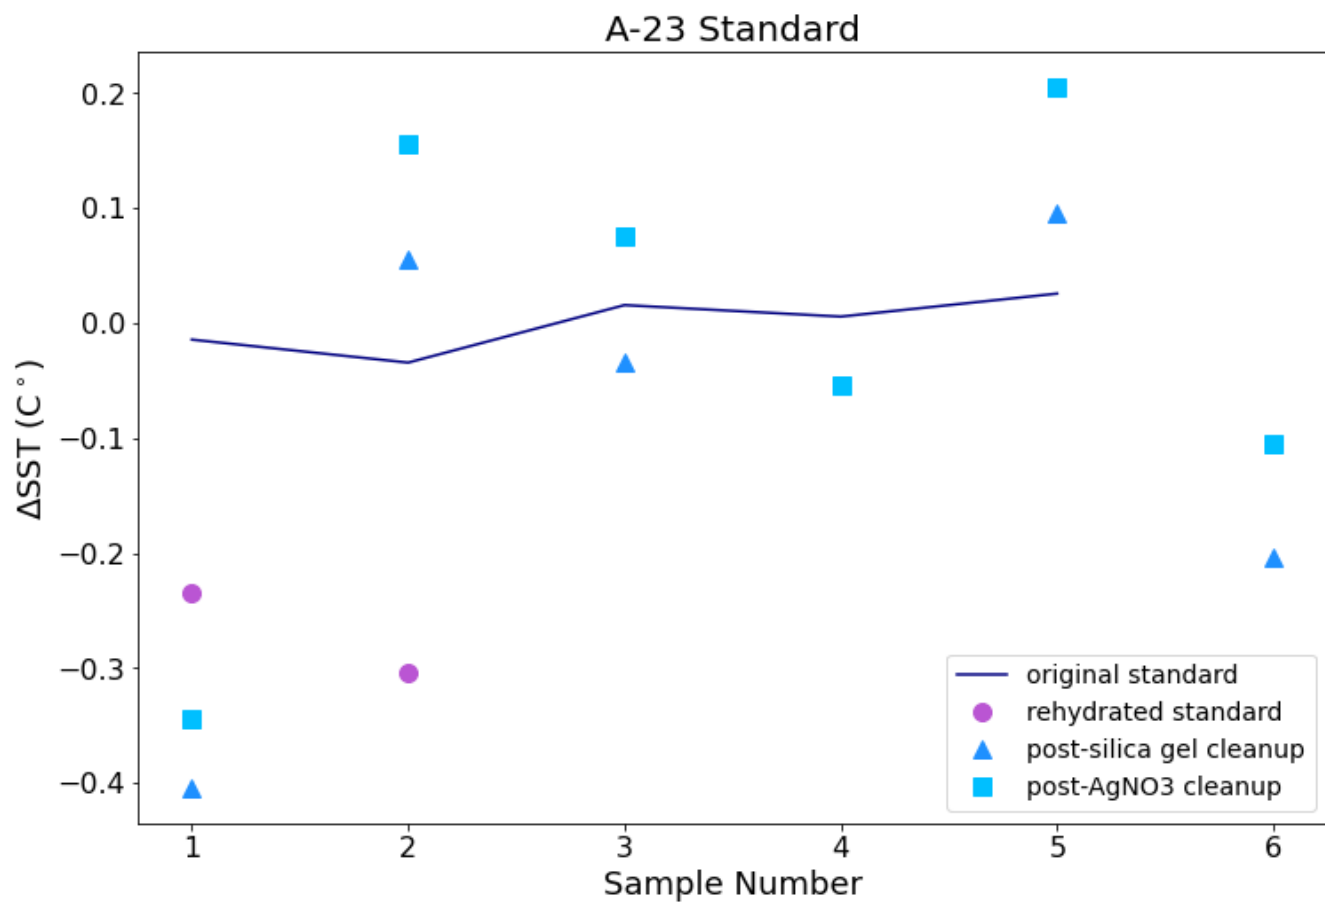

**Fig. S2: The resulting difference in  $U^{K_{37}}$ -based SST between the average SST derived from measurements of our unadulterated in-house alkenone standard (dark blue line) and that derived from the rehydrated in-house standard, in-house standard that was subjected to cleanup by just silica gel columns, and in-house standard that underwent cleanup with both silica gel and silver nitrate. All samples that underwent both forms of cleanup were well within our window of calibration error of  $1.5^{\circ}\text{C}$ .**

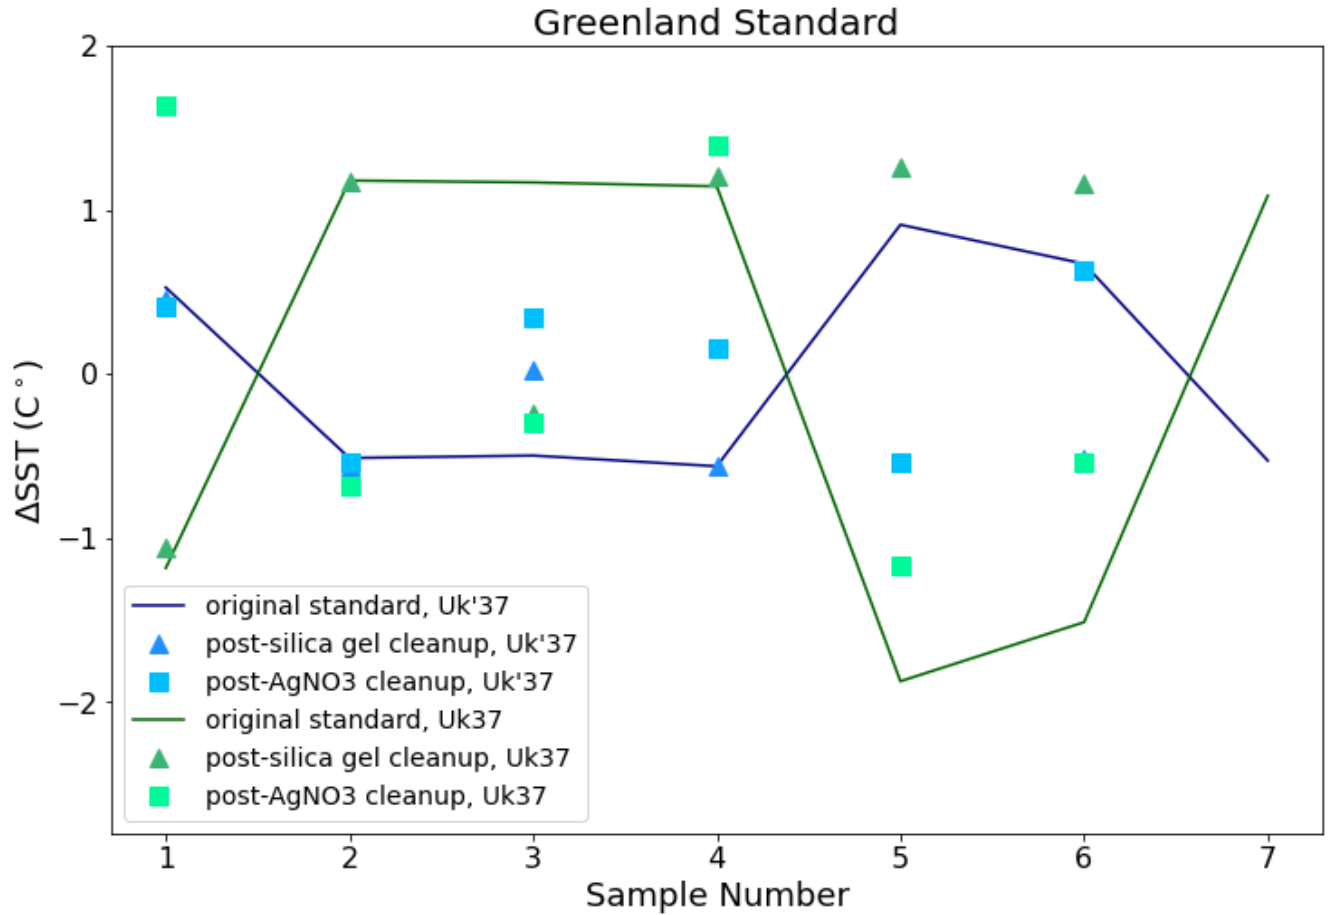

Fig S3: The resulting difference in  $U^{K'_{37}}$ -based (blue) and  $U^{K_{37}}$ -based (green) SST between the average SST derived from measurements of our unadulterated Greenland standard (dark blue/green lines) and those derived from the rehydrated Greenland standard, Greenland standard that was subjected to cleanup by just silica gel columns, and Greenland standard that underwent cleanup with both silica gel and silver nitrate. All SST estimates derived using samples that underwent both forms of cleanup and the  $U^{K'_{37}}$  unsaturation index were within our window of calibration error of 1.5°C.

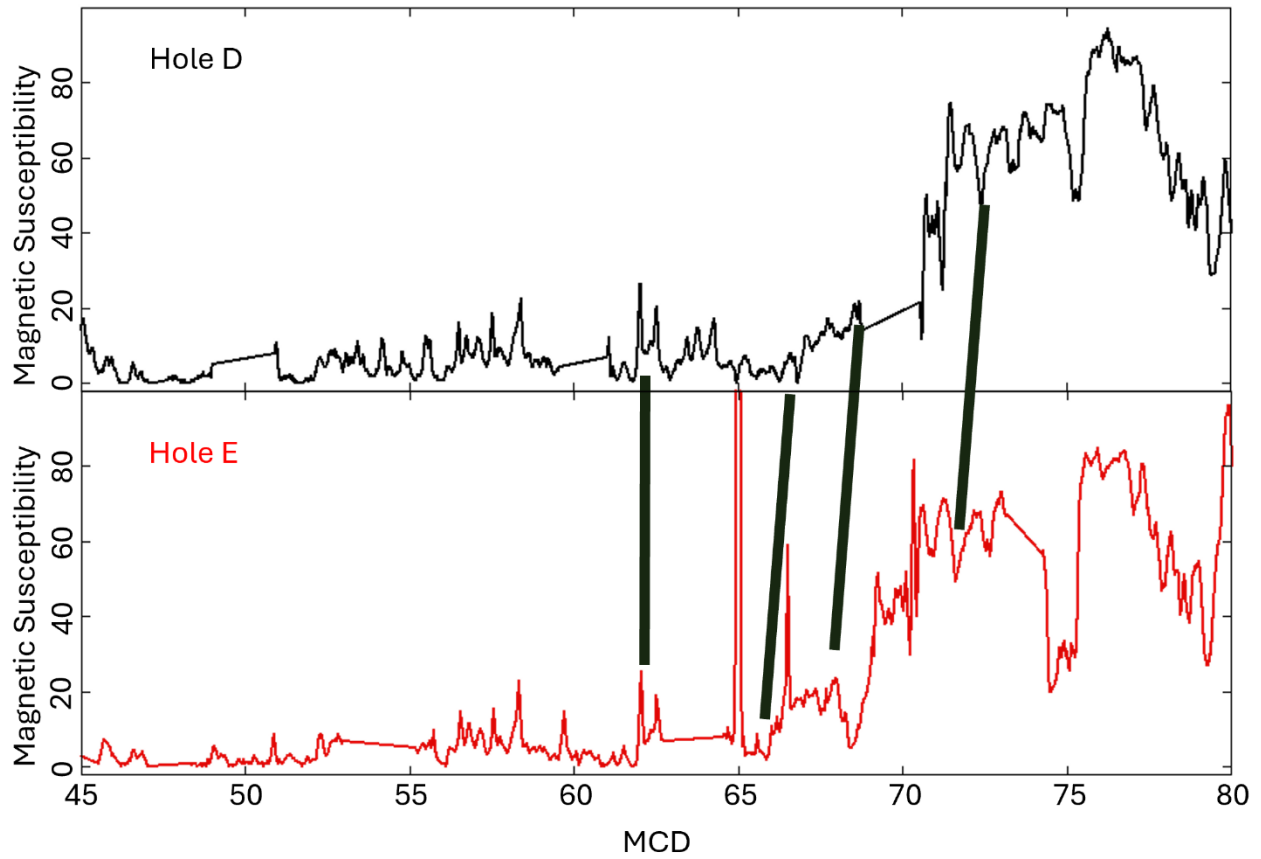

**Fig S4: Magnetic susceptibility measurements from Holes D and E at ODP Site 1090 were utilized to construct our composite sediment record (Shipboard Scientific Party, 1999). Shipboard MCD is used here.**

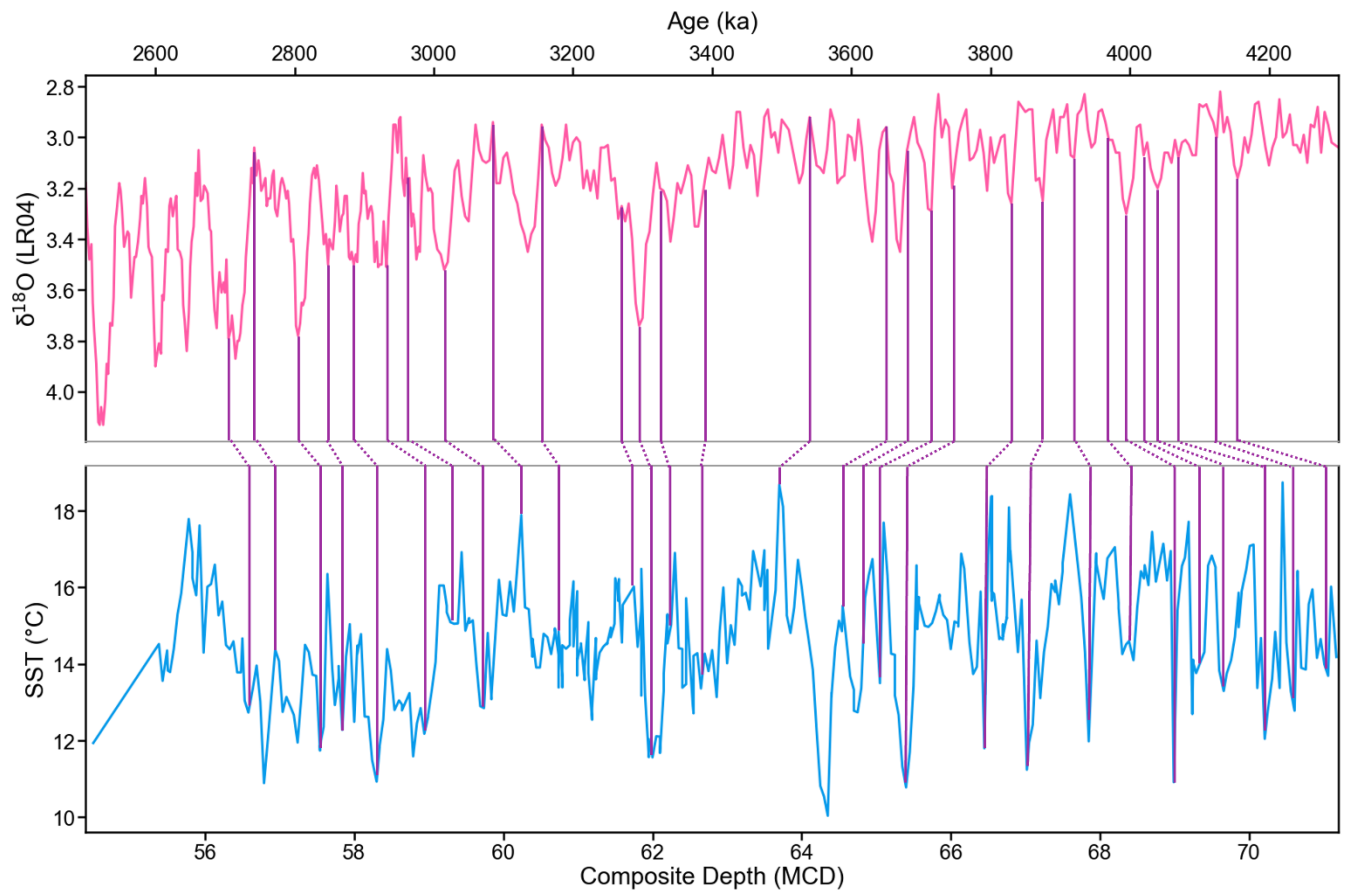

**Fig. S5: Tie lines were established for our ODP Site 1090 age model by aligning our SST record with variations in the LR04 benthic oxygen isotope stack (Lisiecki & Raymo, 2005).**

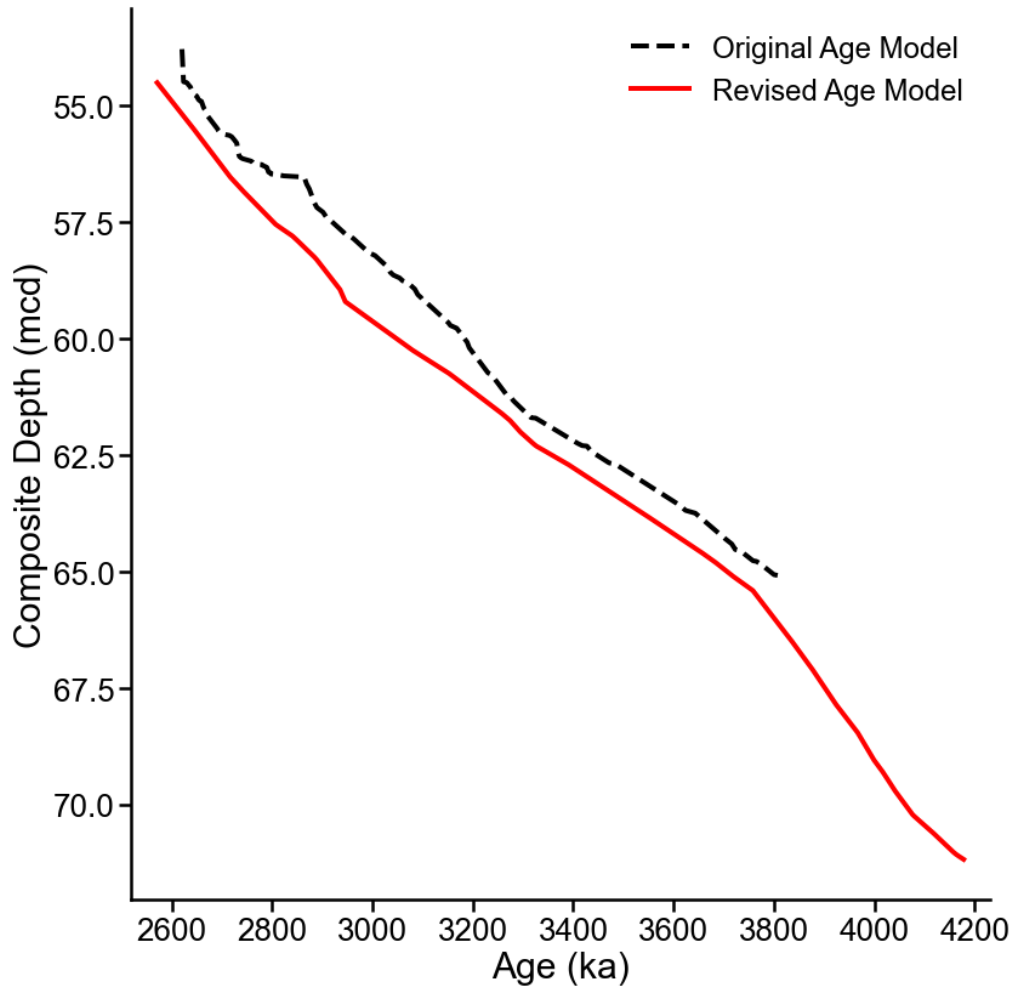

**Fig. S6: Age-depth plots comparing Martínez-García et al.'s (2011) original age-depth model (dashed black line) to the age-depth model produced as a part of this study (solid red line). Our age model avoids large changes in sedimentation rate (Table S3) while also extending the ODP Site 1090 alkenone-based SST record from ~3.8 Ma to ~4.18 Ma.**

### Supplemental References

- Brassell, S. C., Eglinton, G., Marlowe, I. T., Pflaumann, U., and Sarnthein, M.: Molecular stratigraphy: A new tool for climatic assessment, *Nature*, 320, 129–133, <https://doi.org/10.1038/320129a0>, 1986.
- Hodell, D. A., Charles, C. D., Curtis, J. H., Mortyn, P. G., Ninnemann, U. S., and Venz, K. A.: Data report: Oxygen isotope stratigraphy of ODP Leg 177 Sites 1088, 1089, 1090, 1093, and 1094, in: *Proc. ODP, Sci. Results*, Vol. 177, edited by Gersonde, R., Hodell, D. A., and Blum, P., 1–26, 2003, available at: [http://www-odp.tamu.edu/publications/177\\_SR/VOLUME/CHAPTERS/SR177\\_09.PDF](http://www-odp.tamu.edu/publications/177_SR/VOLUME/CHAPTERS/SR177_09.PDF)
- Müller, P. J., Kirst, G., Ruhland, G., von Storch, I., and Rosell-Melé, A.: Calibration of the alkenone paleotemperature index  $U_{37}K'$ , *Geochimica et Cosmochimica Acta*, 62, 1757–1772, [https://doi.org/10.1016/S0016-7037\(98\)00097-0](https://doi.org/10.1016/S0016-7037(98)00097-0), 1998.
- Prahl, F. G., Muehlhausen, L. A., and Zahnle, D. L.: Further evaluation of long-chain alkenones as indicators of paleoceanographic conditions, *Geochimica et Cosmochimica Acta*, 52, 2303–2310, [https://doi.org/10.1016/0016-7037\(88\)90132-9](https://doi.org/10.1016/0016-7037(88)90132-9), 1988.
- Prahl, F. G. and Wakeham, S. G.: Calibration of unsaturation patterns in long-chain ketone compositions, *Nature*, 330, 367–369, <https://doi.org/10.1038/330367a0>, 1987.
